# Supplementary material for: X-ray fluorescence microscopy and X-ray absorption spectroscopy reveal the stability of the plecstatin-1 scaffold in biological model systems: comparison of Ru, Os and Ir analogues
Source: Royal Society of Chemistry journal article supplement (doi:10.1039/d5sc02925b), 2025-01-01
Supplement: d5sc02925b1.pdf [file d5sc02925b1.pdf]

## **X-ray Fluorescence Microscopy and X-ray Absorption Spectroscopy Reveal the Stability of the Plecstatin-1 Scaffold in Biological Model Systems: Comparison of Ru, Os and Ir Analogues**

James H. Lovett,<sup>a</sup> Barry P. Lai,<sup>b</sup> Hugh O. Bloomfield,<sup>c</sup> Ani T. Baker,<sup>a</sup> Matthew P. Sullivan,<sup>c</sup> Christian G. Hartinger<sup>c</sup> and Hugh H. Harris<sup>\*a</sup>

### **Supplementary Information**

#### **TABLE OF CONTENTS**

|                                          |    |
|------------------------------------------|----|
| 1. OPTICAL MICROSCOPY.....               | 2  |
| 2. X-RAY FLUORESCENCE<br>MICROSCOPY..... | 3  |
| 3. ELEMENTAL<br>QUANTITATION.....        | 14 |
| 4. X-RAY ABSORPTION<br>SPECTROSCOPY..... | 17 |

## 1. OPTICAL MICROSCOPY

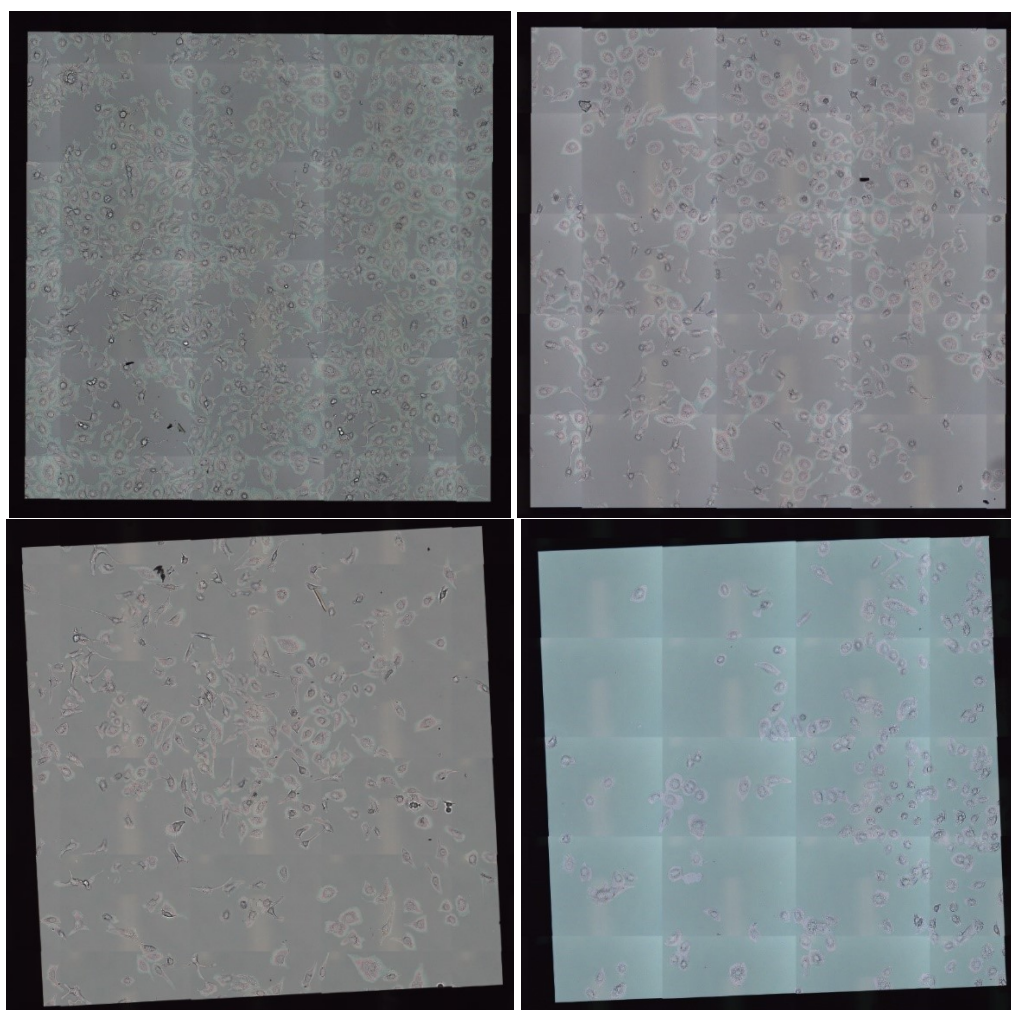

**Figure S1.** Optical micrograph of untreated SKOV-3 control cells (top left) and SKOV-3 cells treated with one of plecstatin-1 (20  $\mu$ M; top right), plecstatin-Os (20  $\mu$ M; bottom left) or plecstatin-Ir (30  $\mu$ M; bottom right). Imaged at the Advanced Photon Source under a visual light microscope. Cells were grown on silicon nitride membranes (Silson).

## 2. X-RAY FLUORESCENCE MICROSCOPY

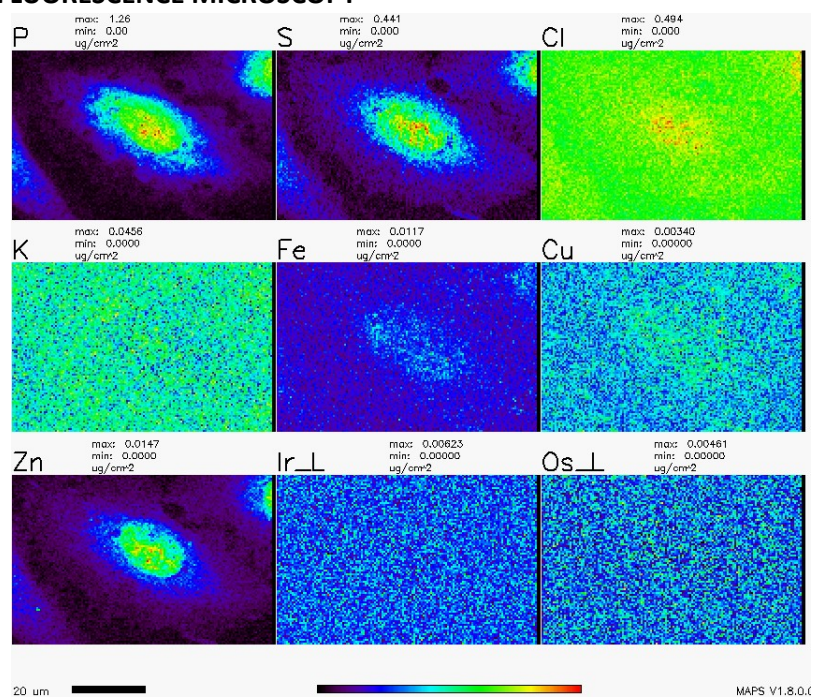

3.

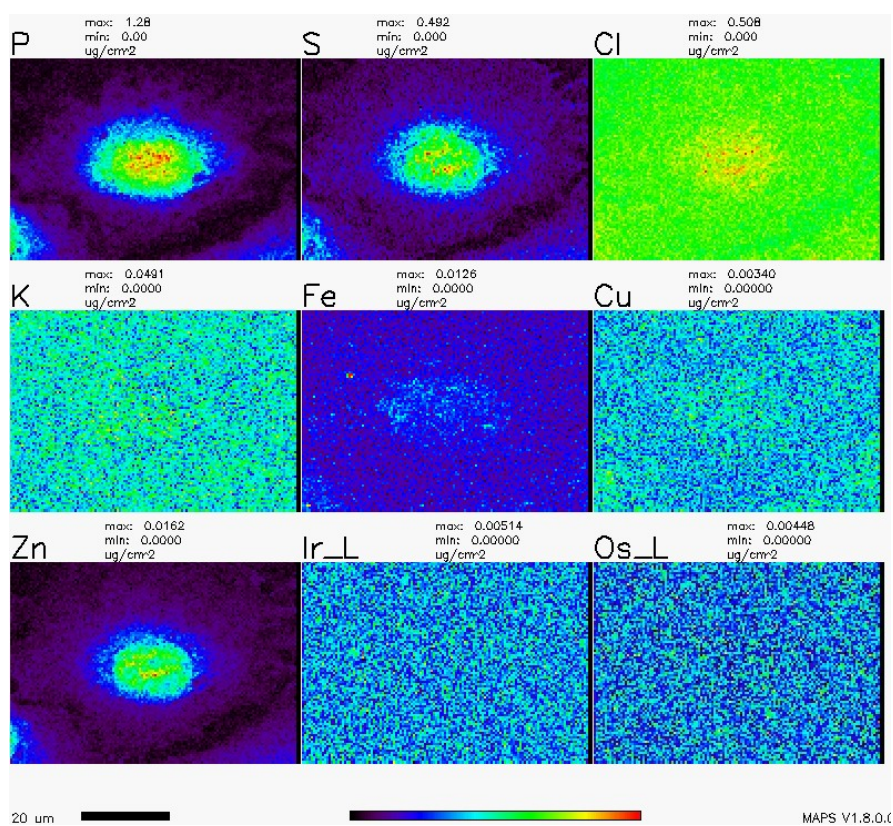

**Figure S2.** Elemental maps of SKOV-3 ovarian cancer control cells (4 h, 37°C, 5% CO<sub>2</sub>). Elemental maps were recorded at the 2-ID-D beamline at the Advanced Photon Source (Argonne National Laboratory, USA). The incident beam energy was 13.1 keV, the beam spot size was 0.50 µm x 0.50 µm and the dwell time was 200 ms.



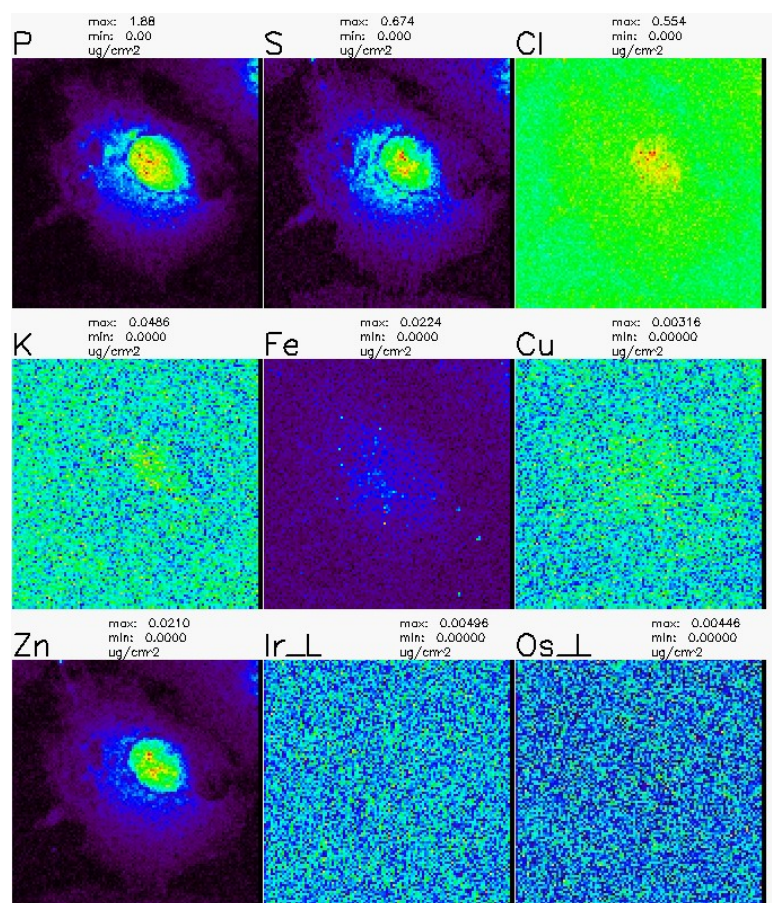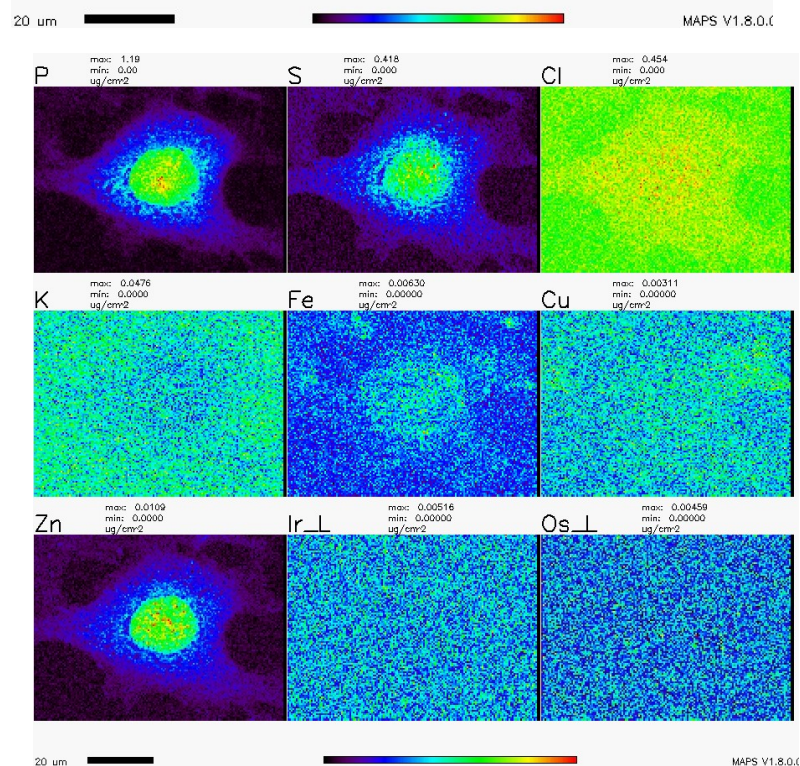

**Figure S2 (cont).** Elemental maps of SKOV-3 ovarian cancer control cells (4 h, 37°C, 5% CO<sub>2</sub>). Elemental maps were recorded at the 2-ID-D beamline at the Advanced Photon Source (Argonne National Laboratory, USA). The incident beam energy was 13.1 keV, the beam spot size was 0.50  $\mu\text{m}$  x 0.50  $\mu\text{m}$  and the dwell time was 200 ms.



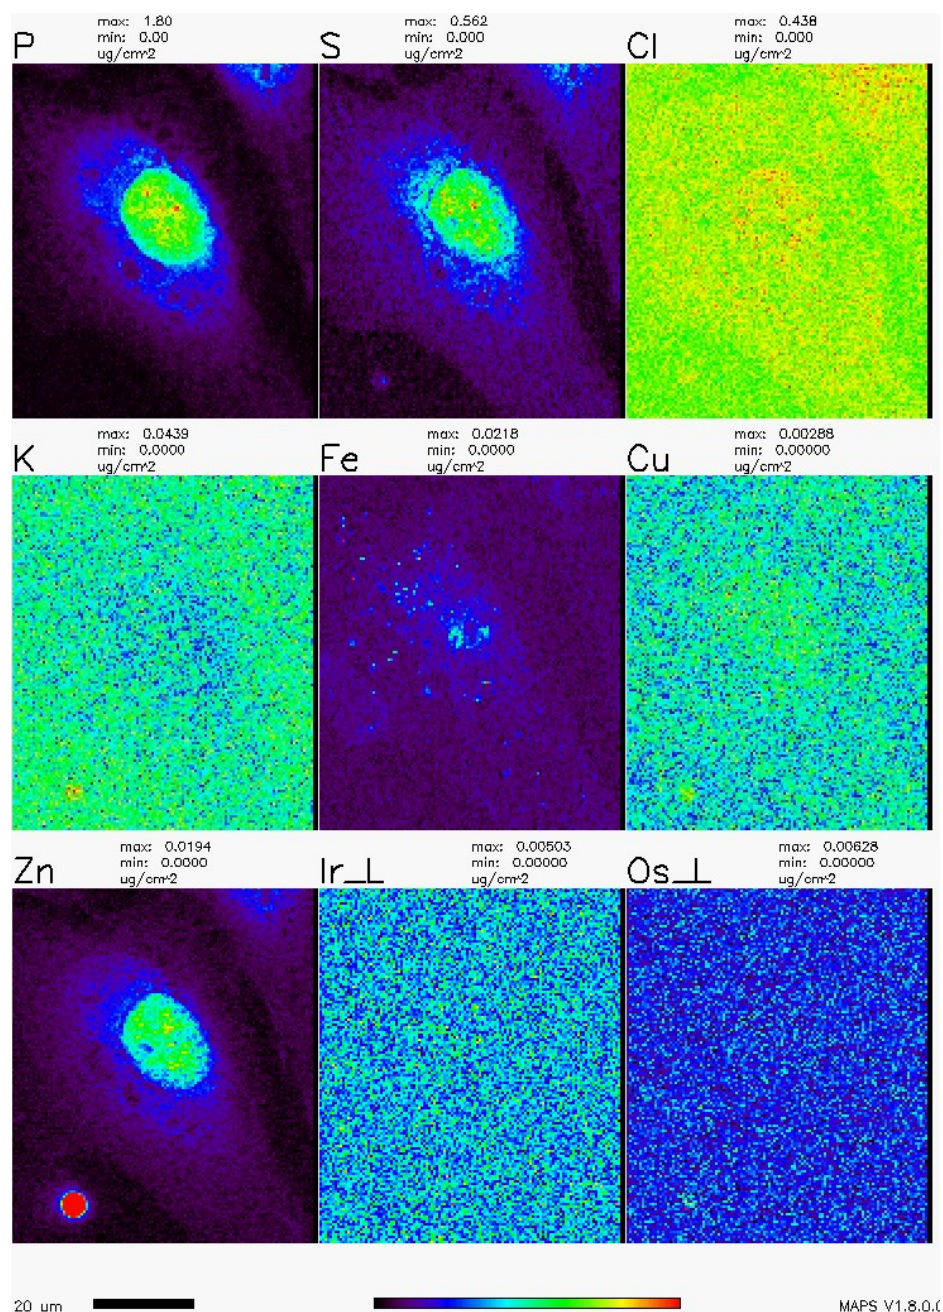

**Figure S2 (cont).** Elemental maps of SKOV-3 ovarian cancer control cells (4 h, 37°C, 5% CO<sub>2</sub>). Elemental maps were recorded at the 2-ID-D beamline at the Advanced Photon Source (Argonne National Laboratory, USA). The incident beam energy was 13.1 keV, the beam spot size was 0.50 μm x 0.50 μm and the dwell time was 200 ms.



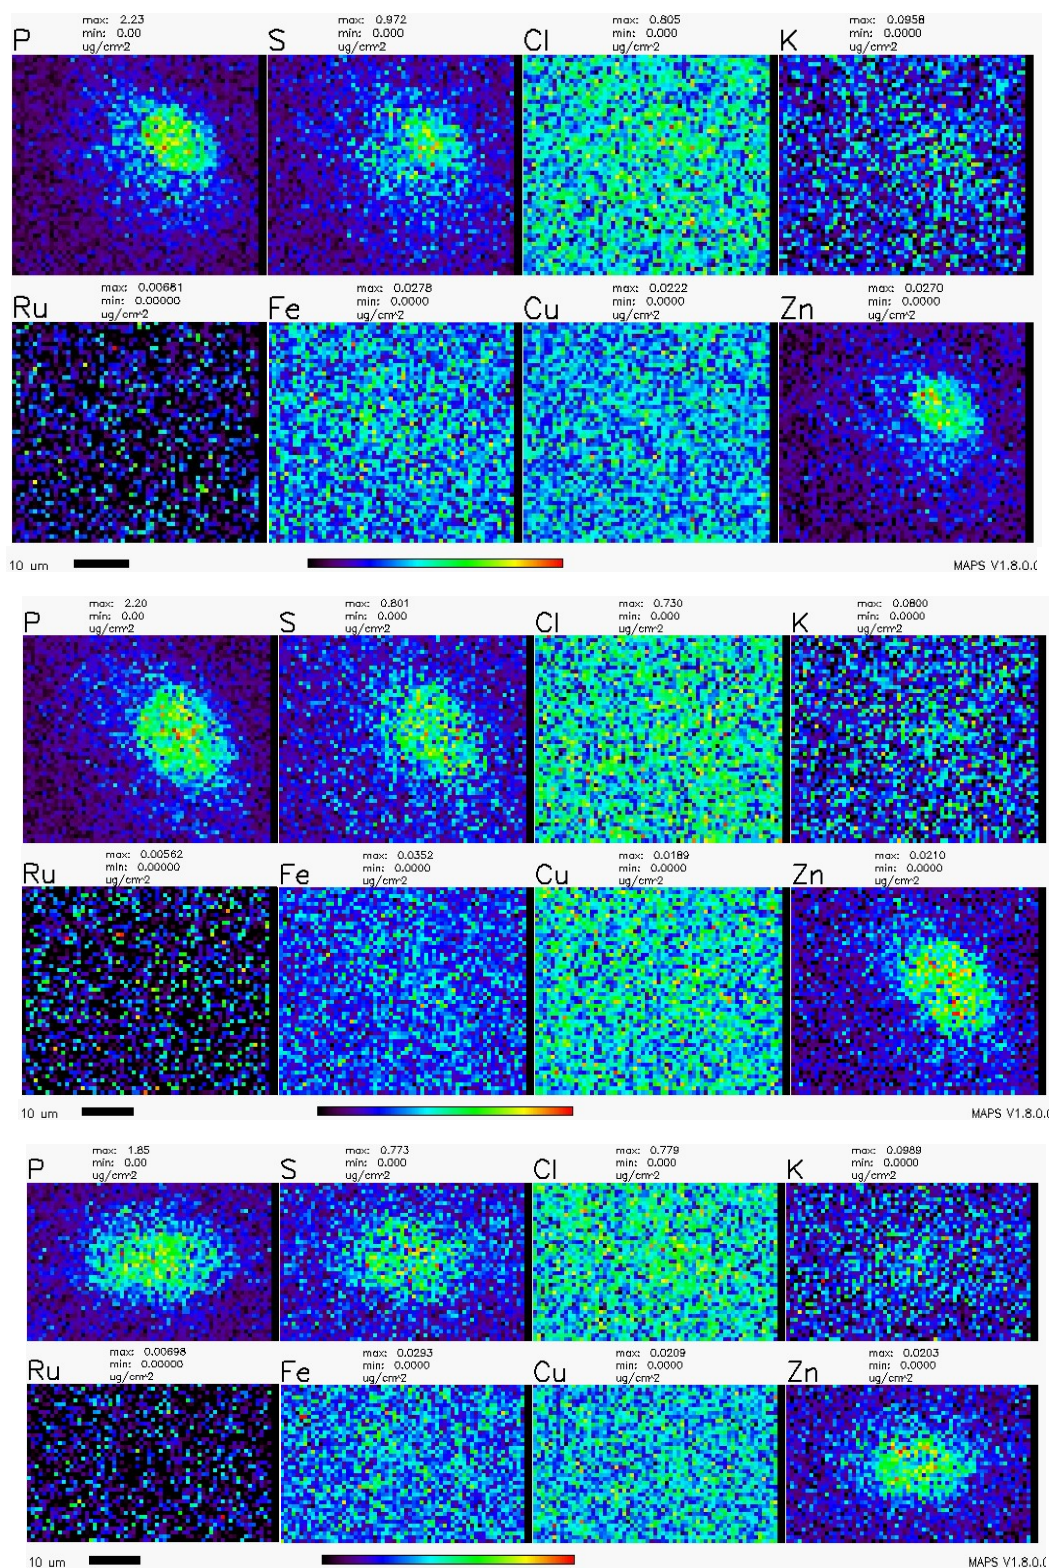

**Figure S3.** Elemental maps of SKOV-3 ovarian cancer control cells (4 h, 37°C, 5% CO<sub>2</sub>). Elemental maps were recorded at the 2-ID-D beamline at the Advanced Photon Source (Argonne National Laboratory, USA). The incident beam energy was 22.7 keV, the beam spot size was 0.75 μm x 0.75 μm and the dwell time was 500 ms.



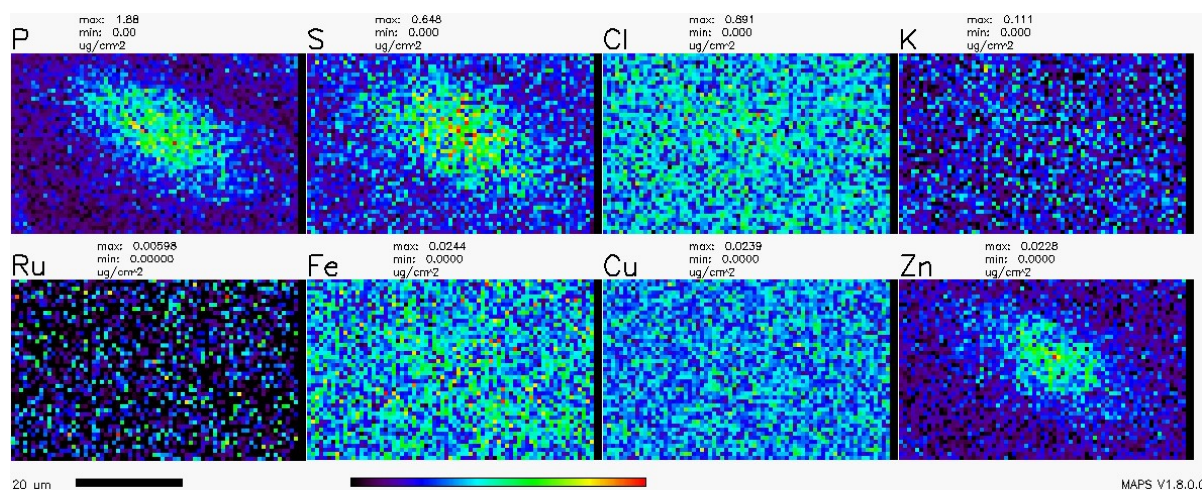

5.

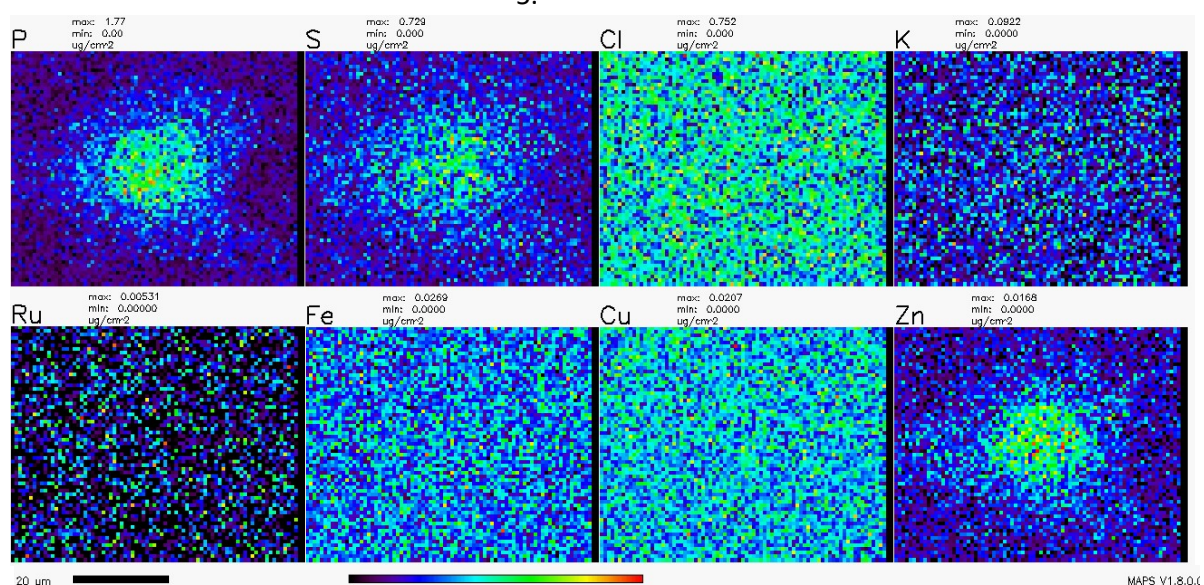

**Figure S3 (cont).** Elemental maps of SKOV-3 ovarian cancer control cells (4 h, 37°C, 5% CO<sub>2</sub>). Elemental maps were recorded at the 2-ID-D beamline at the Advanced Photon Source (Argonne National Laboratory, USA). The incident beam energy was 22.7 keV, the beam spot size was 0.75 μm x 0.75 μm and the dwell time was 500 ms.

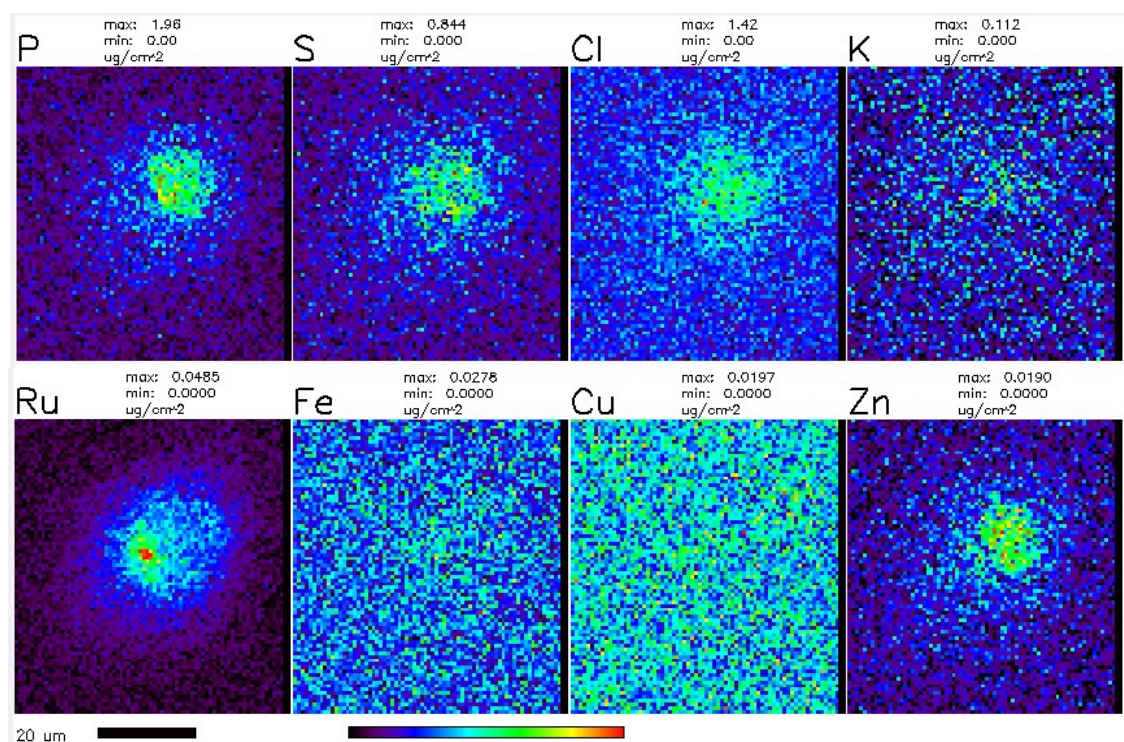



**Figure S4.** Elemental maps of SKOV-3 ovarian cancer cells treated with plecstatin-1 (20  $\mu$ M; 4 h, 37°C, 5% CO<sub>2</sub>). Elemental maps were recorded at the 2-ID-D beamline at the Advanced Photon Source (Argonne National Laboratory, USA). The incident beam energy was 22.7 keV, the beam spot size was 0.75  $\mu$ m x 0.75  $\mu$ m and the dwell time was 500 ms.

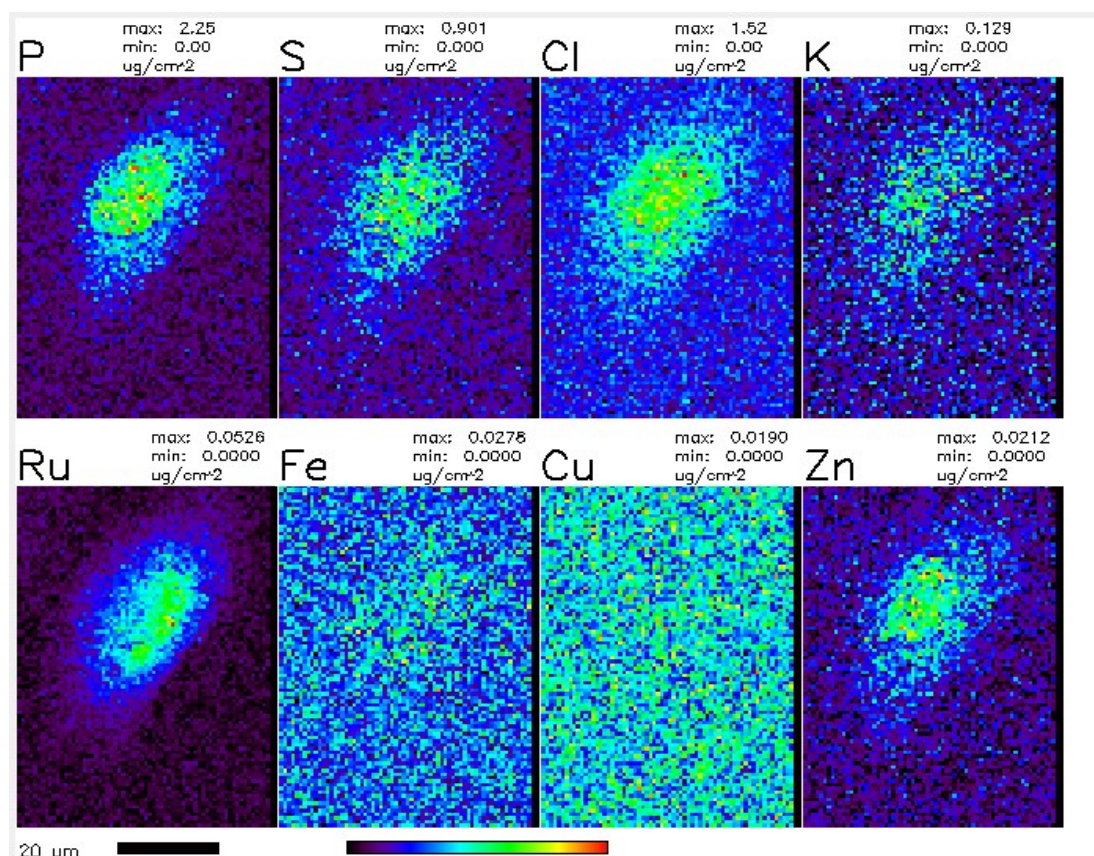

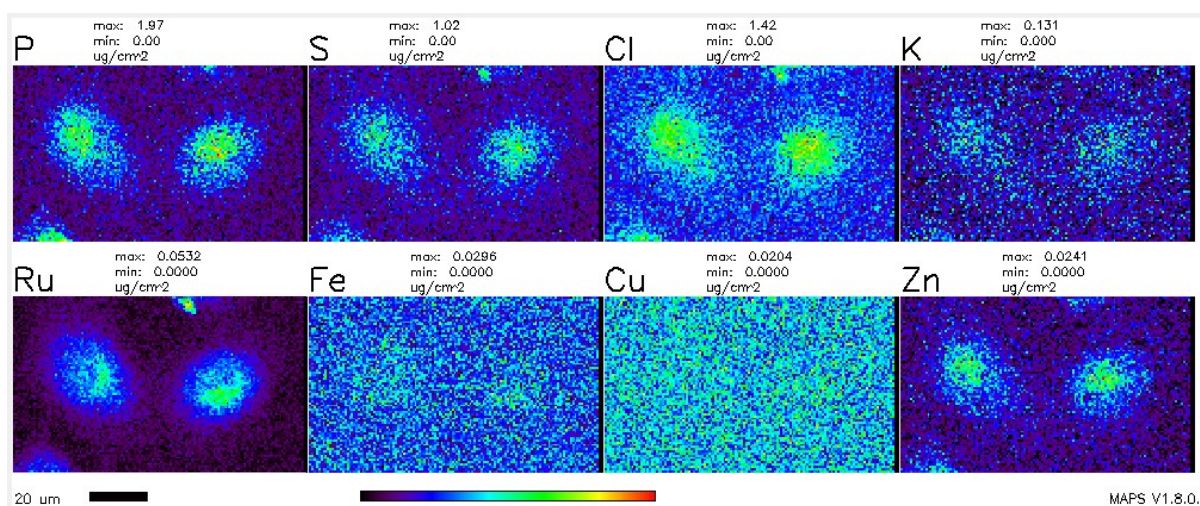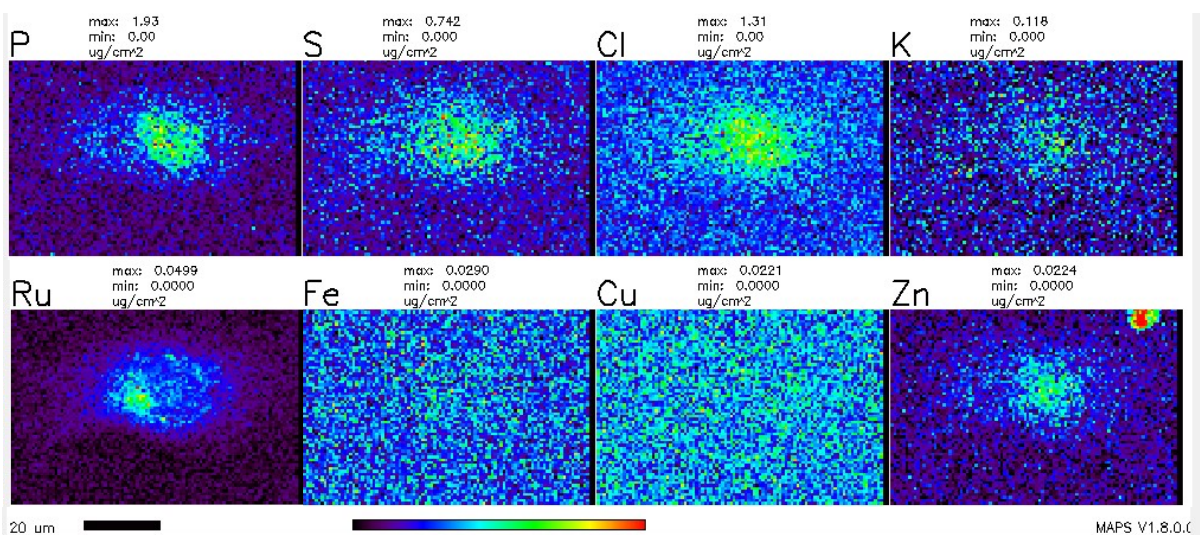

**Figure S4 (cont).** Elemental maps of SKOV-3 ovarian cancer cells treated with plecstatin-1 (20  $\mu$ M; 4 h, 37°C, 5% CO<sub>2</sub>). Elemental maps were recorded at the 2-ID-D beamline at the Advanced Photon Source (Argonne National Laboratory, USA). The incident beam energy was 22.7 keV, the beam spot size was 0.75  $\mu$ m x 0.75  $\mu$ m and the dwell time was 500 ms.



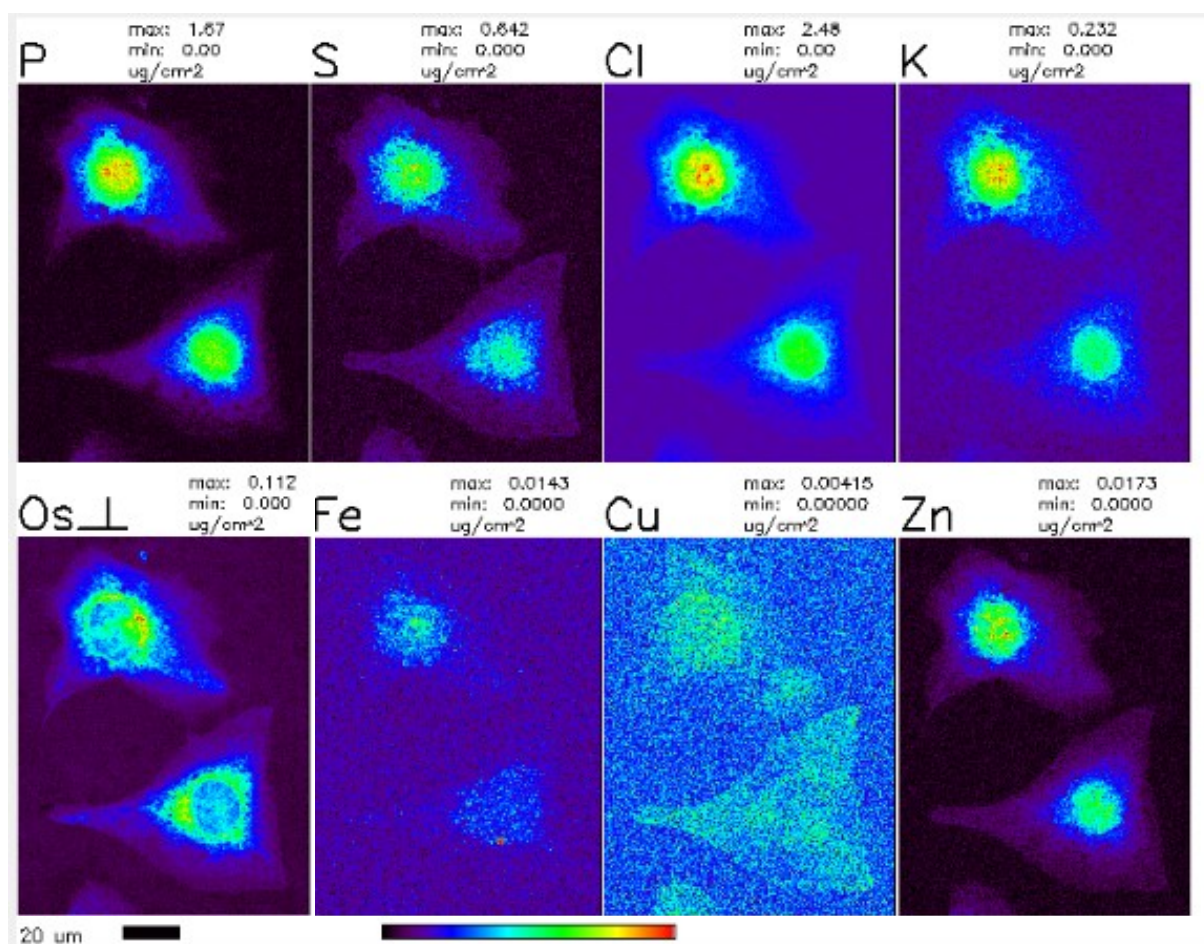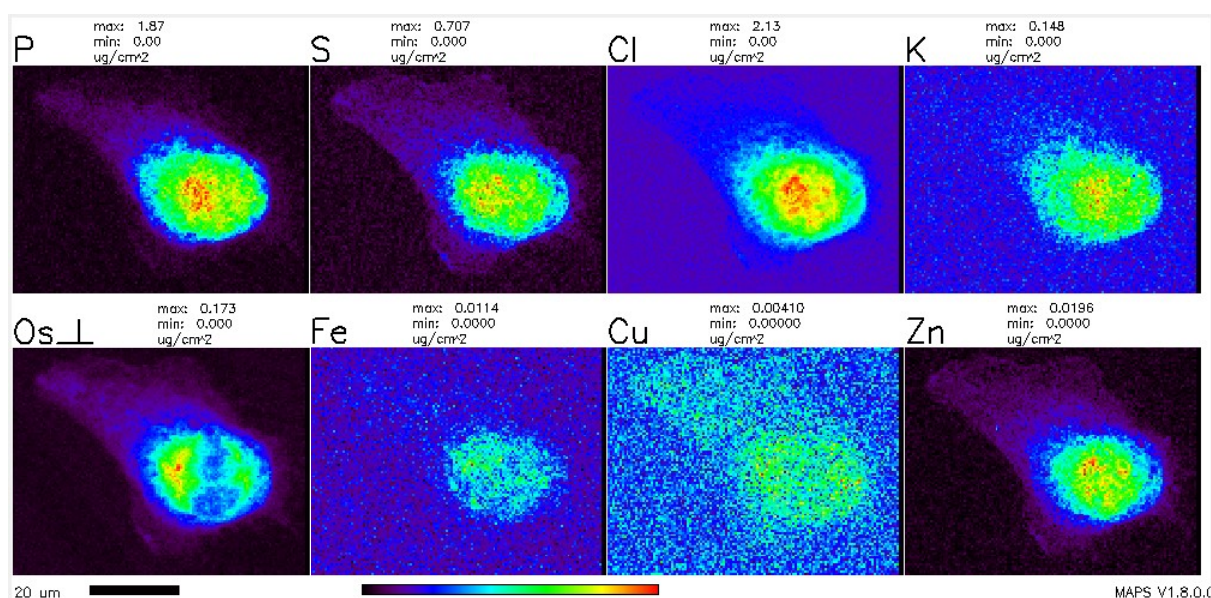

**Figure S5.** Elemental maps of SKOV-3 ovarian cancer cells treated with plecstatin-Os (20  $\mu\text{M}$ ; 4 h, 37°C, 5%  $\text{CO}_2$ ). Elemental maps were recorded at the 2-ID-D beamline at the Advanced Photon Source (Argonne National Laboratory, USA). The incident beam energy was 13.1 keV, the beam spot size was 0.50  $\mu\text{m}$  x 0.50  $\mu\text{m}$  and the dwell time was 150 ms.



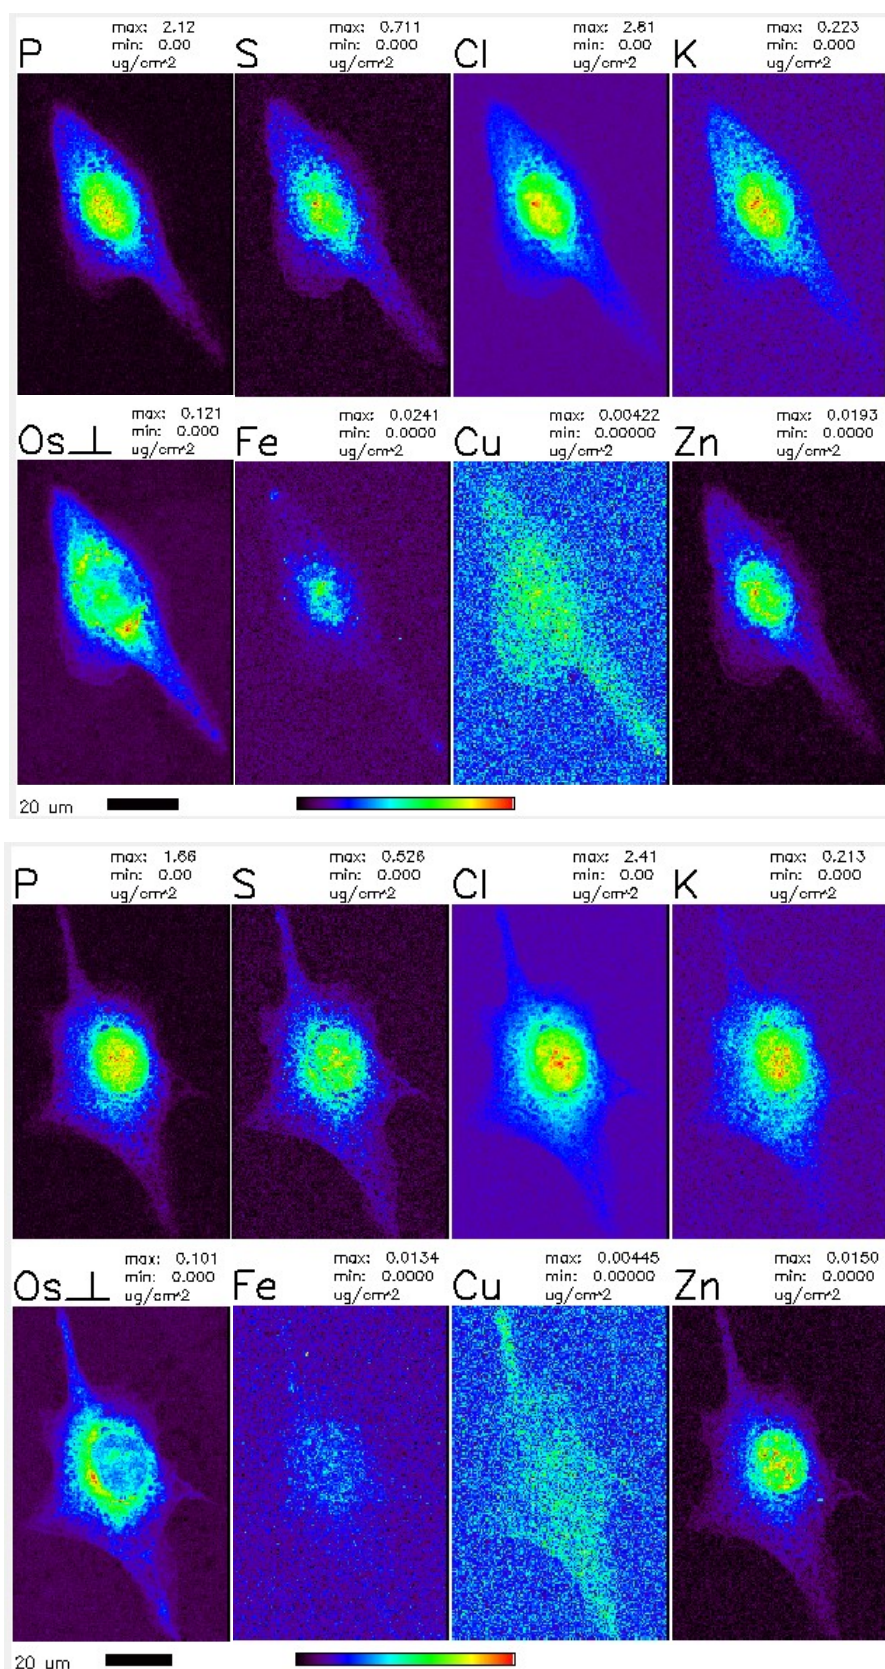

**Figure S5 (cont).** Elemental maps of SKOV-3 ovarian cancer cells treated with plecstatin-Os (20 μM; 4 h, 37°C, 5% CO<sub>2</sub>). Elemental maps were recorded at the 2-ID-D beamline at the Advanced Photon Source (Argonne National Laboratory, USA). The incident beam energy was 13.1 keV, the beam spot size was 0.50 μm x 0.50 μm and the dwell time was 150 ms.



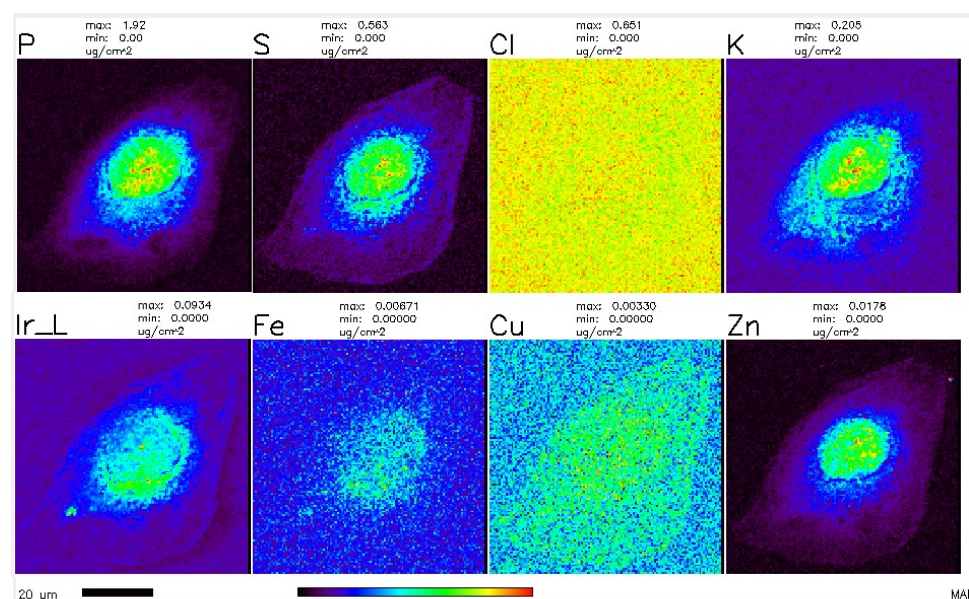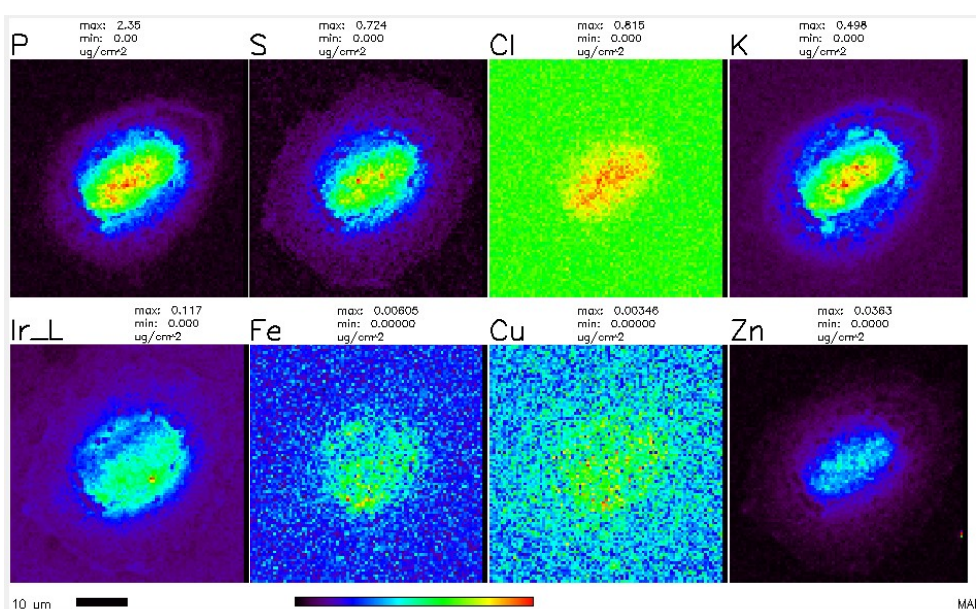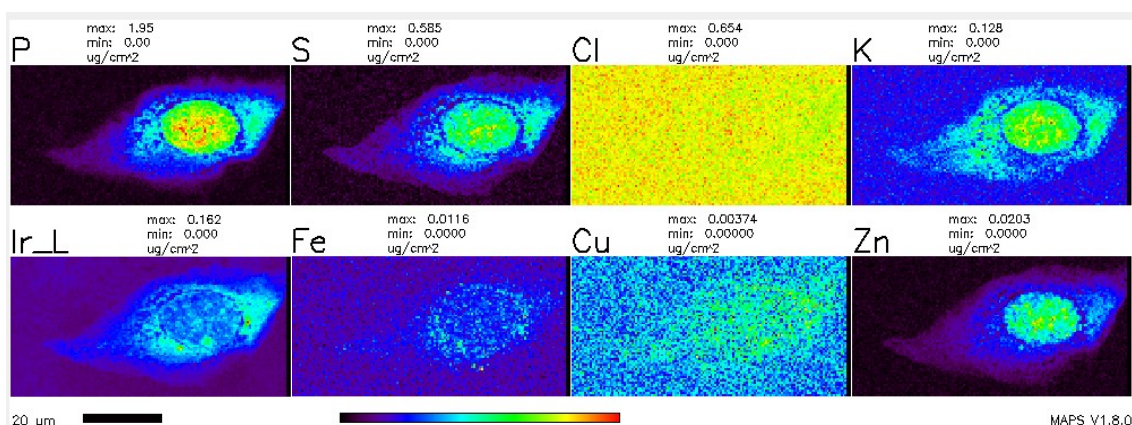

**Figure S6.** Elemental maps of SKOV-3 ovarian cancer cells treated with plecstatin-Ir (30  $\mu$ M; 4 h, 37°C, 5% CO<sub>2</sub>). Elemental maps were recorded at the 2-ID-D beamline at the Advanced Photon Source (Argonne National Laboratory, USA). The incident beam energy was 13.1 keV, the beam spot size was 0.50  $\mu$ m x 0.50  $\mu$ m and the dwell time was 250 ms.



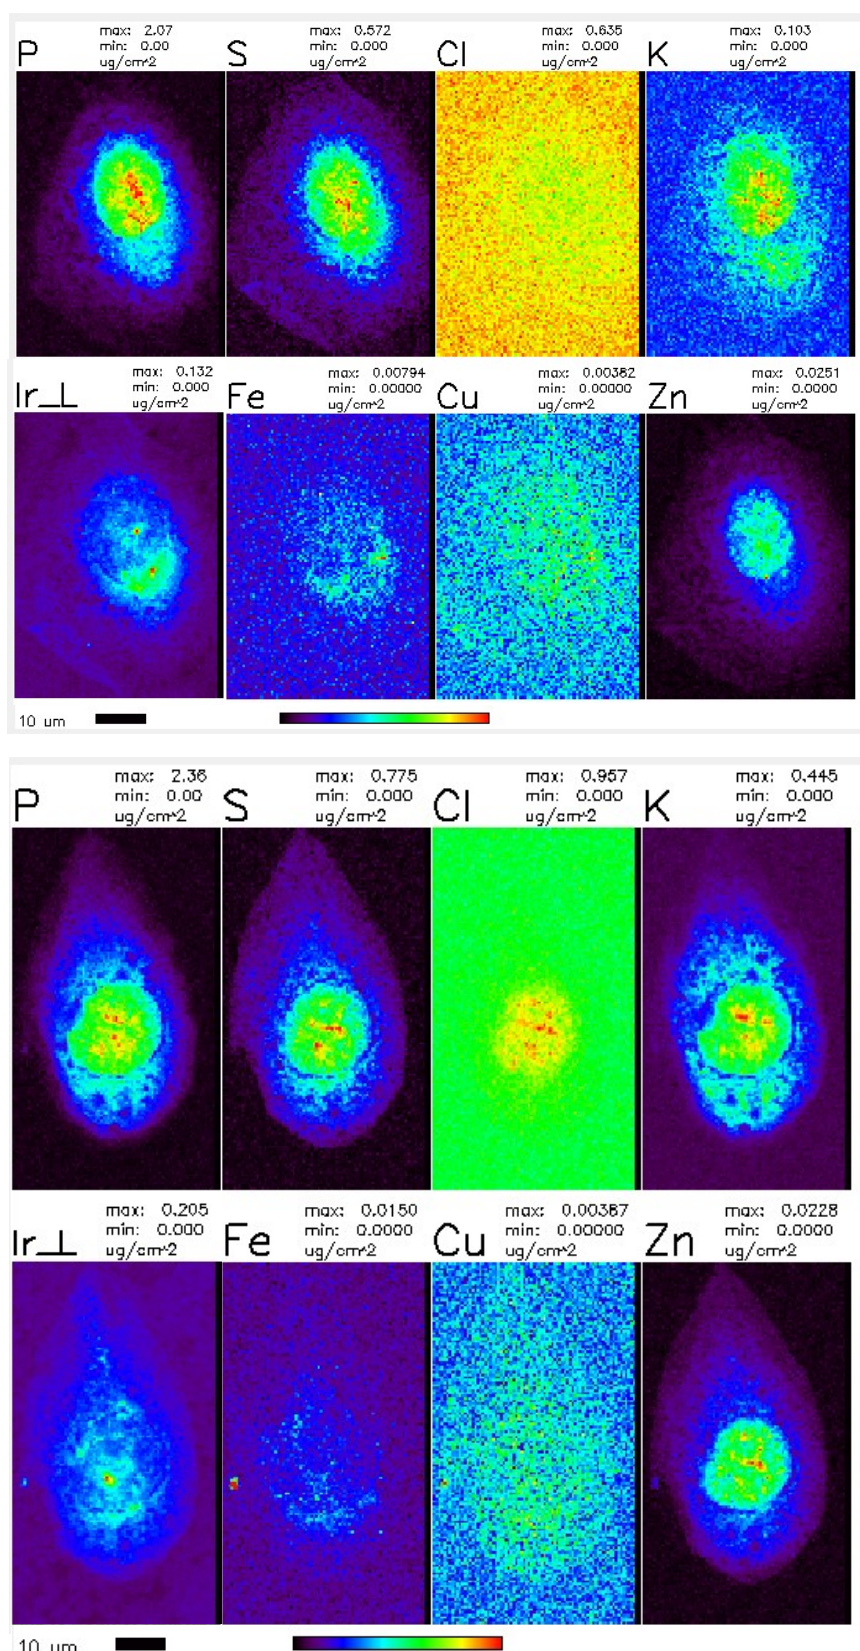

**Figure S6 (cont).** Elemental maps of SKOV-3 ovarian cancer cells treated with plecstatin-Ir (30 μM; 4 h, 37°C, 5% CO<sub>2</sub>). Elemental maps were recorded at the 2-ID-D beamline at the Advanced Photon Source (Argonne National Laboratory, USA). The incident beam energy was 13.1 keV, the beam spot size was 0.50 μm x 0.50 μm and the dwell time was 250 ms.



### 3. ELEMENTAL QUANTITATION

**Table S1.** Average intracellular mass (fg) of elements in treated SKOV-3 cells and controls (n = 5 for all sample groups). Uncertainty in the mean is expressed as standard error of the mean (SEM). <sup>1</sup> Measurements were recorded using an incident beam energy of 13.1 keV. <sup>2</sup> Measurements were recorded using an incident beam energy of 22.7 keV. <sup>3</sup> Units of cell area are given in  $\mu\text{m}^2$ .

|                                | <i>Control</i> <sup>1</sup> | <i>Plecstatin-Os</i> <sup>1</sup> | <i>Plecstatin-Ir</i> <sup>1</sup> | <i>Control</i> <sup>2</sup> | <i>Plecstatin-1</i> <sup>2</sup> |
|--------------------------------|-----------------------------|-----------------------------------|-----------------------------------|-----------------------------|----------------------------------|
| <i>Cell areas</i> <sup>3</sup> | 2105 ± 205                  | 2207 ± 216                        | 1545 ± 203                        | 1493 ± 101                  | 1864 ± 80                        |
| <i>Ru</i>                      | -                           | -                                 | -                                 | 10.9 ± 0.8                  | 152 ± 4                          |
| <i>Os</i>                      | 32 ± 3                      | 171 ± 12                          | 27 ± 3                            | -                           | -                                |
| <i>Ir</i>                      | 40 ± 4                      | 38 ± 4                            | 489 ± 69                          | -                           | -                                |
| P                              | 5229 ± 429                  | 5527 ± 357                        | 7179 ± 685                        | 6690 ± 443                  | 7530 ± 298                       |
| S                              | 2015 ± 132                  | 1956 ± 124                        | 2150 ± 229                        | 3094 ± 170                  | 3796 ± 115                       |
| Cl                             | 7096 ± 611                  | 11504 ± 524                       | 8342 ± 1009                       | 5108 ± 307                  | 8673 ± 310                       |
| K                              | 457 ± 40                    | 1138 ± 84                         | 1149 ± 257                        | 332 ± 17                    | 483 ± 19                         |
| Ca                             | 118 ± 4                     | 58 ± 4                            | 55 ± 6                            | 300 ± 13                    | 289 ± 10                         |
| Fe                             | 51 ± 4                      | 51 ± 5                            | 33 ± 4                            | 143 ± 9                     | 169 ± 7                          |
| Mn                             | 16 ± 1                      | 18 ± 2                            | 13 ± 2                            | 63 ± 4                      | 75 ± 3                           |
| Cu                             | 29 ± 2                      | 44 ± 4                            | 25 ± 3                            | 123 ± 8                     | 153 ± 6                          |
| Zn                             | 51 ± 4                      | 47 ± 3                            | 55 ± 6                            | 73 ± 4                      | 84 ± 3                           |

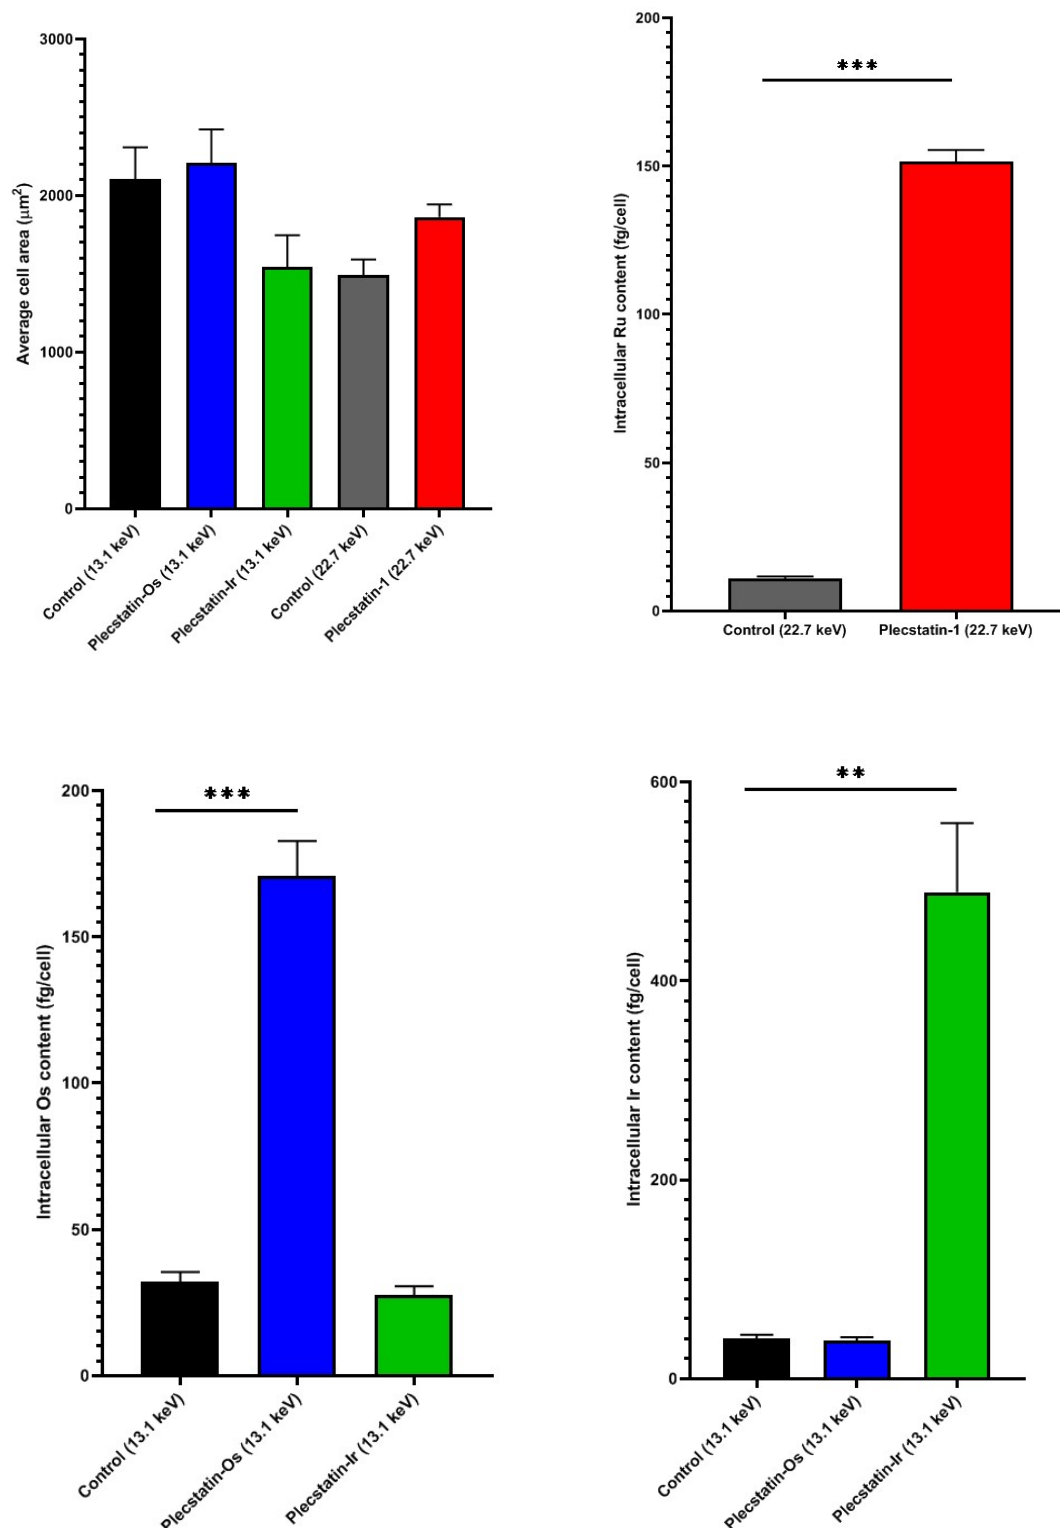

**Figure S7.** Results of elemental quantitation performed for plecstatin and its derivatives using the ROI Analysis tool in the XFM software analysis program MAPS. Top left; average cell areas calculated from the regions of interest drawn for each cell analysed across all sample groups. Top right; intracellular Ru content calculated of cells treated with plecstatin-1 and untreated control SKOV-3 cells measured with an incident beam energy of 22.7 keV. Bottom left; intracellular Os content of cells treated with plecstatin-Os, plecstatin-Ir or untreated control SKOV-3 cells measured with an incident beam energy of 13.7 keV. Bottom right; intracellular Ir content of cells treated with plecstatin-Ir, plecstatin-Os or untreated control SKOV-3 cells measured with an incident beam energy of 13.7 keV. Sample size  $n = 5$  for all sample groups. Error bars are the standard error in the mean. \*\*  $p < 0.01$ , \*\*\*  $p < 0.001$ .



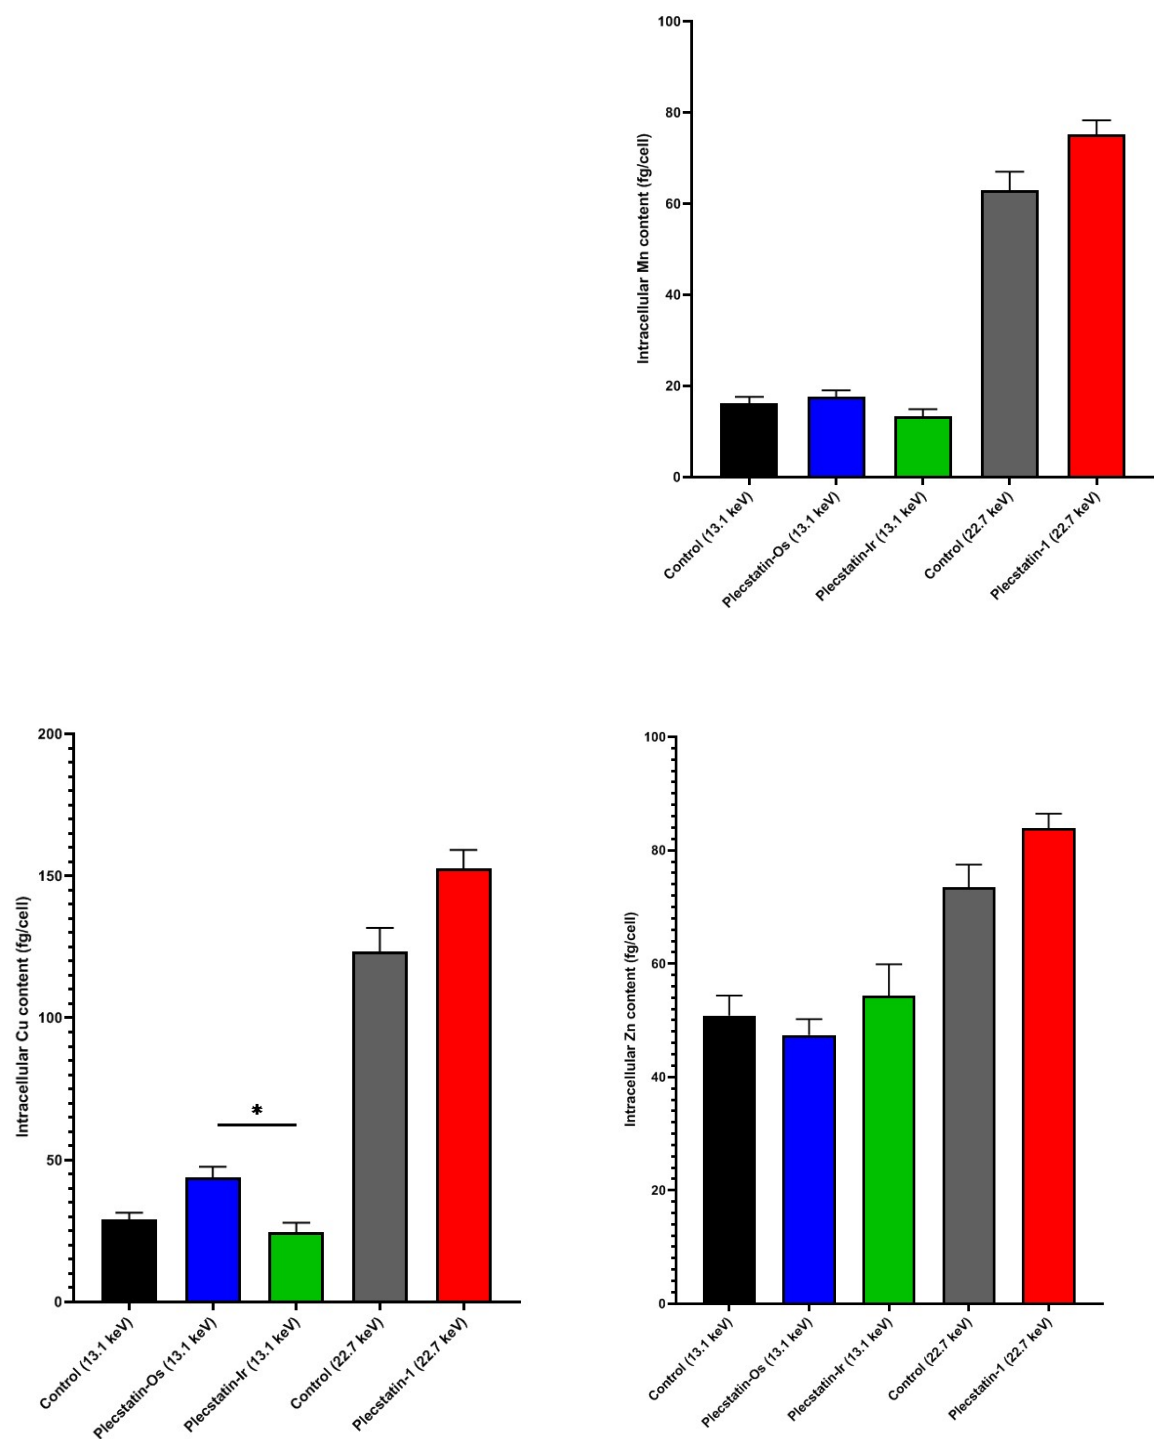

**Figure S8.** Endogenous metal (Mn, Fe, Cu, Zn) elemental quantitation performed using the ROI Analysis tool in the XFM software analysis program MAPS. Sample size  $n = 5$  for all sample groups. Error bars are the standard error in the mean. \*  $p < 0.05$ . NB:  $p$ -values have not been provided for pairs of samples measured with different beam energies as only measurements taken using the same incident energy are considered valid comparisons.

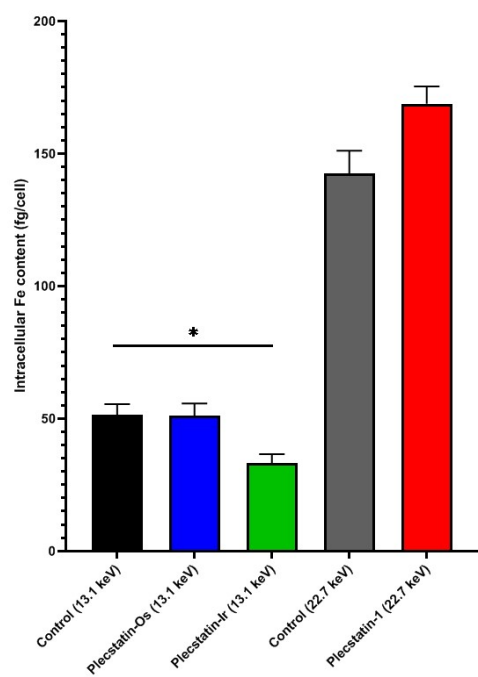



#### 4. X-RAY ABSORPTION SPECTROSCOPY

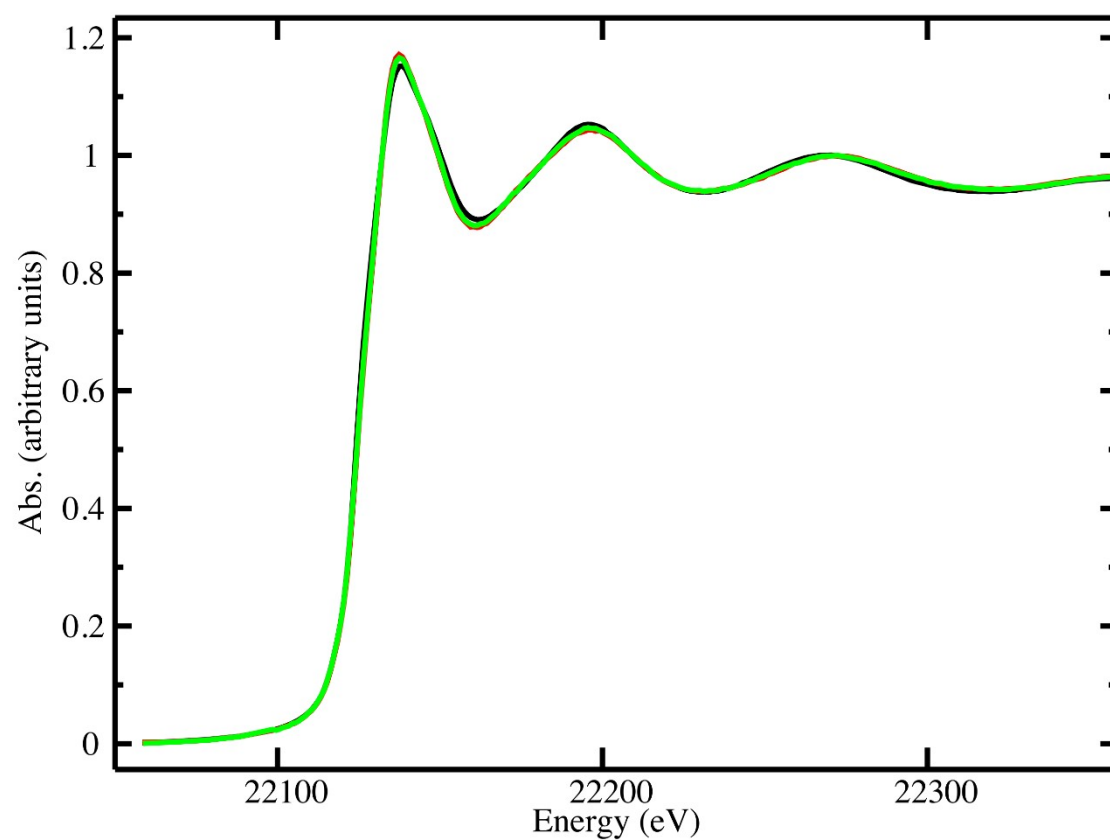

**Figure S9.** X-ray absorption near edge spectra of plecstatin-1 ground in cellulose (black) and plecstatin-1 incubated in media (1 mM, DMEM/F12, 10% DMSO) in the absence (green) or presence (red) of 10% foetal bovine serum.
